# Supplementary material for: Microbial functional diversity indicators in vineyard soils under organic and biodynamic land management
Source: Research Square preprint supplement (doi:10.21203/rs.3.rs-5347876/v1), 2024-11-12
Supplement: Supplementary file 1 [file 09b12d8bb63ec07e45ac1adf.docx]

Supplementary-Table 1a. Mean induced respiration rates for L-arabinose (Ara), D-galactose (Gal), D-glucose (Glc), D-fructose (Fru), sorbitol (Sor), protocatechuic acid (ProCa), malic acid (MA), citric acid (CA), and distilled water (≈ basal respiration), in four vineyard soils without (BD-) and with (BD+) application of biodynamic preparations.

|  | Ara | Gal | Glc | Fru | Sor | ProCa | MA | CA | H2O |
| --- | --- | --- | --- | --- | --- | --- | --- | --- | --- |
|  |  |  |  | (µl CO2 g-1 soil h-1) | | |  |  |  |
| BD- | |  |  |  |  |  |  |  |  |
| Prissé | 12.0 b | 11.6 b | 17.4 b | 17.0 b | 10.1 b | 7.9 a | 27.8 a | 30.2 a | 2.1 a |
| Flurie | 1.9 d | 2.1 d | 5.1 d | 5.1 d | 2.5 d | 2.6 b | 4.3 c | 2.9 d | 0.7 d |
| Lavernette | 17.8 a* | 16.9 a | 21.7 a* | 21.0 a* | 14.2 a | 6.8 a | 26.9 a | 27.0 b* | 1.5 b |
| Prés Culey | 7.2 c | 7.0 c | 9.3 c | 10.3 c | 5.0 c | 2.6 b | 18.8 b | 16.7 c | 1.0 c |
| Mean | 9.7 | 9.4 | 13.3 | 13.3 | 7.9 | 5.0 | 19.5 | 19.2 | 1.3 |
| BD+ | |  |  |  |  |  |  |  |
| Prissé | 14.8 a* | 13.4 b* | 21.5 a* | 19.7 a* | 11.5 a* | 11.4 a* | 31.3 a | 30.4 a | 2.6 a |
| Fleurie | 3.3 c* | 3.1 d* | 8.9 d* | 9.4 c* | 3.3 c* | 3.4 d* | 6.7 d* | 4.3 d* | 0.9 d |
| Lavernette | 16.1 a | 15.6 a | 19.4 b | 19.5 a | 13.1 a | 5.7 b | 26.2 b | 24.1 b | 1.7 b |
| Prés Culey | 8.2 b* | 7.4 c | 14.3 c* | 12.5 b* | 5.5 b | 2.8 c | 22.7 c | 20.7 c* | 1.1 c |
| Mean | **10.6** | **9.9** | **16.0** | **15.3** | **8.3** | **5.8** | **21.7** | **20.0** | **1.6** |
| Probability values | |  |  |  |  |  |  |  |
| BD | <0.01 | <0.01 | <0.01 | <0.01 | 0.01 | 0.01 | <0.01 | <0.01 | <0.01 |
| Vineyard | <0.01 | <0.01 | <0.01 | <0.01 | <0.01 | <0.01 | <0.01 | <0.01 | <0.01 |
| V × BD | <0.01 | <0.01 | <0.01 | <0.01 | 0.01 | 0.01 | <0.01 | <0.01 | NS |
| CV (%) | 10 | 9.4 | 11 | 9.5 | 12 | 17 | 13 | 6.6 | 15 |

CV = mean coefficient of variation between replicate samples (n = 6); different letters within a column indicate a vineyard-specific difference for each treatment (Holm-Sidak test, *P* < 0.05); an asterisk indicates a significant higher value between the BD treatments, showing vineyard × BD interactions; bold numbers indicate a significant higher mean between the BD treatments.

Supplementary-Table 1b. Mean induced respiration rates for N-acetyl-glucosamine (NAG), D-glucosamine (GlcN), D-galactosamine (GalN), γ-amino butyric acid (GABA), L-serine (Ser), L-alanine (Ala), L-cysteine (Cys), L-glutamine (GluN), and L-leucine (Leu) in four vineyard soils without (BD-) and with (BD+) application of biodynamic preparations.

|  | NAG | GlcN | GalN | GABA | Ser | Ala | Cys | GluN | Leu |
| --- | --- | --- | --- | --- | --- | --- | --- | --- | --- |
|  |  |  |  | (µl CO2 g-1 soil h-1) | | |  |  |  |
| BD‑ |  |  |  |  |  |  |  |  |  |
| Prissé | 7.5 b | 8.8 a | 7.5 a | 3.9 a | 14.8 b | 8.7 a | 4.1 a | 11.5b | 3.7 b |
| Fleurie | 2.0 d | 0.7 c | 0.7 d | 1.4 b | 2.2 d | 1.7 c | 3.0 b | 2.0d | 1.0 d |
| Lavernette | 9.9 a | 8.3 a | 6.2 b | 3.7 a | 18.9 a | 10.8 a | 3.7 a* | 12.8a | 4.3 a |
| Prés Culey | 2.9 c | 5.1 b | 2.9 c | 1.4 b | 8.5 c | 4.4 b | 1.0 c | 5.4c | 1.9 c |
| Mean | 5.6 | 5.5 | 4.3 | 2.6 | 11.1 | 6.4 | 3.0 | 7.9 | 2.7 |
| BD+ |  |  |  |  |  |  |  |  |  |
| Prissé | 9.0 a* | 10.2 a | 8.5 a | 4.8 a* | 17.6 a* | 11.1 a* | 5.3 a* | 14.1a* | 4.7 a* |
| Fleurie | 3.8 b* | 1.1 c | 0.9 c | 2.2 c* | 4.0 c* | 2.7 d* | 4.1 b* | 3.8c* | 1.4 c |
| Lavernette | 9.4 a | 9.1 a | 6.7 d | 3.9 b | 17.7 a | 10.6 b | 3.1 c | 13.2a | 4.6 a |
| Prés Culey | 3.3 b | 4.2 b | 4.1 c | 2.0 d* | 9.6 b | 4.6 c | 1.4 d | 6.4b* | 2.0 b |
| Mean | **6.4** | **6.4** | **5.1** | **3.2** | **12.2** | **7.3** | **3.5** | **9.4** | **3.2** |
| BD | <0.01 | <0.01 | <0.01 | <0.01 | <0.01 | <0.01 | <0.01 | <0.01 | <0.01 |
| Vineyard | <0.01 | <0.01 | 0.01 | <0.01 | <0.01 | <0.01 | <0.01 | <0.01 | <0.01 |
| V × BD | <0.01 | NS | NS | <0.01 | <0.01 | <0.01 | <0.01 | 0.03 | 0.03 |
| CV (%) | 14 |  | 27 |  | 12 | 14 | 13 |  |  |

CV = mean coefficient of variation between replicate samples (n = 6); different letters within a column indicate a vineyard-specific difference for each treatment (Holm-Sidak test, *P* < 0.05); an asterisk indicates a significant higher value between the BD treatments, showing vineyard × BD interactions; bold numbers indicate a significant higher mean between the BD treatments.
